# Supplementary material
Source: PubMed Central journal article supplement (PMC6444910)
Supplement: NIHMS1008533-supplement-Suppl.pdf [file NIHMS1008533-supplement-Suppl.pdf]

## Supporting Information

### Radioligand Therapy of Prostate Cancer with a Long-lasting PSMA

#### Targeting Agent $^{90}\text{Y}$ -DOTA-EB-MCG

Zhantong Wang<sup>†</sup>, Orit Jacobson<sup>†</sup>, Rui Tian<sup>†</sup>, Ronnie C. Mease<sup>‡</sup>, Dale O. Kiesewetter<sup>†</sup>, Gang Niu<sup>†\*</sup>, Martin G. Pomper<sup>‡</sup>, Xiaoyuan Chen<sup>†\*</sup>

<sup>†</sup>Laboratory of Molecular Imaging and Nanomedicine, National Institute of Biomedical Imaging and Bioengineering (NIBIB), National Institutes of Health (NIH), Bethesda, Maryland, 20892, USA

<sup>‡</sup>Department of Radiology and Radiological Science, Johns Hopkins Medical Institutions, Baltimore, Maryland, 21205, USA

Running title: RLT of PCa using  $^{90}\text{Y}$ -DOTA-EB-MCG

**Disclosure Statement:** No potential conflicts of interest relevant to this article exist.

\*Correspondence should be addressed to:

Gang Niu, Ph.D.

Laboratory of Molecular Imaging and Nanomedicine (LOMIN),  
National Institute of Biomedical Imaging and Bioengineering (NIBIB),  
National Institutes of Health (NIH), Bethesda, MD 20892, USA

Bldg. 35A, Room GD959

E-mail: [niug@mail.nih.gov](mailto:niug@mail.nih.gov)

Or

Xiaoyuan Chen, Ph.D.

Laboratory of Molecular Imaging and Nanomedicine (LOMIN),  
National Institute of Biomedical Imaging and Bioengineering (NIBIB),  
National Institutes of Health (NIH), Bethesda, MD 20892, USA

Bldg. 35A, Room GD937

E-mail: [shawn.chen@nih.gov](mailto:shawn.chen@nih.gov)

## Materials and Methods

### General

MCG was kindly provided by Dr. Martin Pomper at Johns Hopkins University. DOTA-maleimide was purchased from Macrocyclics (Plano, TX). Synthesis and characterization of DOTA-Maleimide-EB (DMEB) derivative was previously reported by us <sup>1</sup>. Purification and analysis of the conjugated MCG molecules (DOTA-MCG and DOTA-EB-MCG) was done according to the published procedure <sup>2</sup>.

### Synthesis of DOTA-MCG and EB-DOTA-MCG

MCG (1.05 eq.) was dissolved in 0.1 mL H<sub>2</sub>O and added to either DOTA-Maleimide DOTA-Maleimide-EB (1eq) in 0.5 mL in 0.1% Na-ascorbate (w/v) in PBS. The reaction was stirred for 1-2 h at room temperature and purified by HPLC to give the desired conjugated products in a chemical purity >95% and a yield of 70-75%. LC-MS analysis confirmed mass of 819.2 [M-H]<sup>-</sup> for DOTA-MCG and 1501.5 [M-H]<sup>-</sup> for DOTA-EB-MCG.

### Radioisotope Labeling

<sup>86</sup>YCl<sub>3</sub> was purchased from NIH Cyclotron Facility. <sup>90</sup>YCl<sub>3</sub> was purchased from Perkin-Elmer. 10 μL (185-370 MBq) of <sup>86</sup>YCl<sub>3</sub> (370 MBq) and/or <sup>90</sup>YCl<sub>3</sub> were diluted with 0.5 mL 0.4 M ammonium acetate pH 5.6. Then 100 μg of either DOTA-EB-MCG or DOTA-MCG in 10 μL of H<sub>2</sub>O was added and the reaction mixed for 20 min at 80°C. Purity of the products was assayed by radio-TLC (AR-2000 Bioscan scanner), using iTLC plates (Fisher) and 0.1 M Citric acid pH 5 as the developing solvent for <sup>86/90</sup>Y-DOTA-EB-MCG and normal phase plates and 2% EDTA/NH<sub>4</sub>OAc (10% w/v) for <sup>86/90</sup>Y-DOTA-MCG. R<sub>f</sub> of free <sup>86/90</sup>Y ~ 0.9; R<sub>f</sub> of <sup>86/90</sup>Y-DOTA-

EB-MCG and  $^{86/90}\text{Y}$ -DOTA-MCG  $\sim 0.1$ . A radiochemical yield of greater than 95% was achieved for both compounds with specific activities of 68-75mCi/ $\mu\text{mol}$ .

**Table S1.** Hematologic analysis of blood samples from untreated mice and mice treated with 7.4 MBq of  $^{90}\text{Y}$ -DOTA-MCG (n=3)

|                               | $^{90}\text{Y}$ -DOTA-EB-MCG<br>(7.4 MBq) | Control           |
|-------------------------------|-------------------------------------------|-------------------|
| WBC ( $10^9/\text{L}$ )       | $3.2 \pm 0.5$                             | $3.3 \pm 0.7$     |
| RBC ( $10^{12}/\text{L}$ )    | $9.3 \pm 0.4$                             | $9.1 \pm 0.7$     |
| Hemoglobin (g/L)              | $118.9 \pm 10.9$                          | $127.8 \pm 13.6$  |
| Platelets ( $10^9/\text{L}$ ) | $896.3 \pm 192.1$                         | $932.6 \pm 154.3$ |
| MCV (fL)                      | $52.1 \pm 2.3$                            | $50.8 \pm 4.1$    |
| LYM # ( $10^9/\text{L}$ )     | $1.8 \pm 0.2$                             | $1.6 \pm 0.3$     |
| MID # ( $10^9/\text{L}$ )     | $1.2 \pm 0.2$                             | $1.3 \pm 0.3$     |
| GRAN # ( $10^9/\text{L}$ )    | $4.5 \pm 0.4$                             | $5.7 \pm 0.8$     |
| LYM (%)                       | $47.8 \pm 9.3$                            | $53.2 \pm 8.7$    |
| MID (%)                       | $6.8 \pm 1.2$                             | $6.5 \pm 0.7$     |
| GRAN (%)                      | $51.2 \pm 8.9$                            | $53.2 \pm 10.6$   |

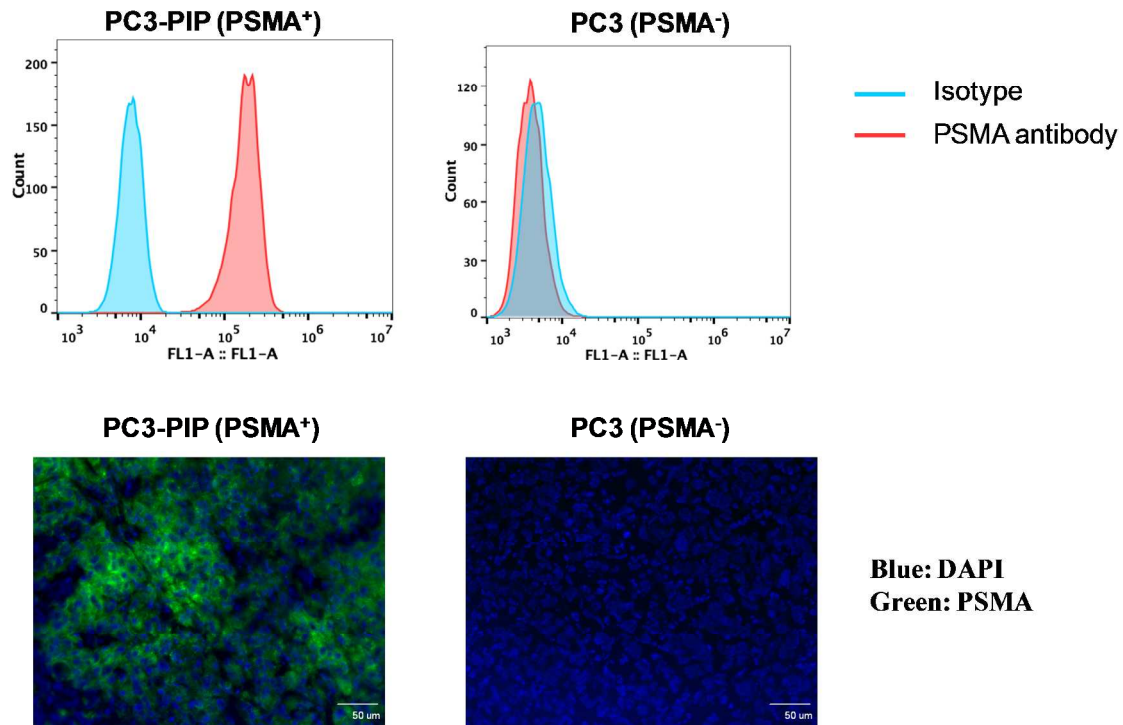

**Figure S1.** Flowcytometry of PMSA positive PC3-PIP and PMSA negative PC3 cells using antibody against PSMA. Immunofluorescence staining of tumor sections originated from PC3-PIP and PC3 cells.

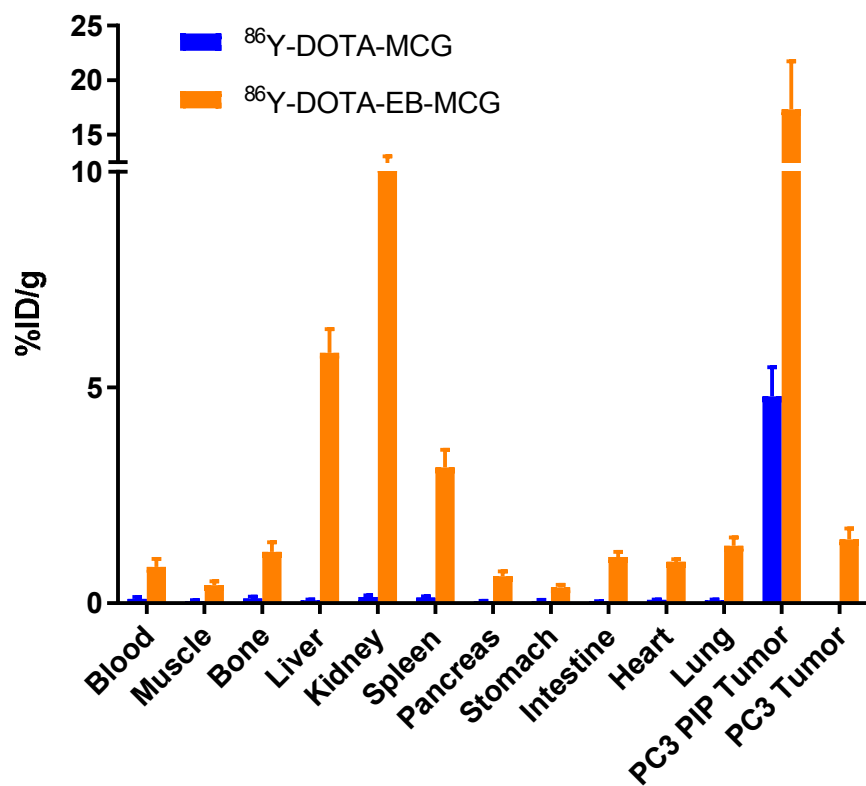

**Figure S2.** Biodistribution of  $^{86}\text{Y}$ -DOTA-MCG and  $^{86}\text{Y}$ -EB-DOTA-MCG in normal organs and PSMA positive/negative tumors at 48 hr p.i..

**Table S2.** PET quantification of tumor, muscle and liver at different time points for  $^{86}\text{Y}$ -DOTA-MCG and  $^{86}\text{Y}$ -EB-DOTA-MCG.

|             |        | <b>1 h</b> | <b>4 h</b> | <b>24 h</b> | <b>48 h</b> |
|-------------|--------|------------|------------|-------------|-------------|
| DOTA-MCG    | Tumor  | 17.05±3.17 | 16.26±3.54 | 10.94±1.47  | 0.34±0.06   |
|             | Muscle | 0.51±0.04  | 0.25±0.01  | 0.04±0.01   | 0.05±0.02   |
|             | Liver  | 0.48±0.01  | 0.15±0.007 | 0.08±0.01   | 0.07±0.01   |
| DOTA-EB-MCG | Tumor  | 22.03±2.29 | 32.11±4.15 | 39.87±4.64  | 34.42±3.22  |
|             | Muscle | 3.37±0.29  | 2.27±0.09  | 1.24±0.16   | 1.26±0.12   |
|             | Liver  | 8.51±0.18  | 7.22±0.37  | 6.55±0.27   | 6.28±0.26   |

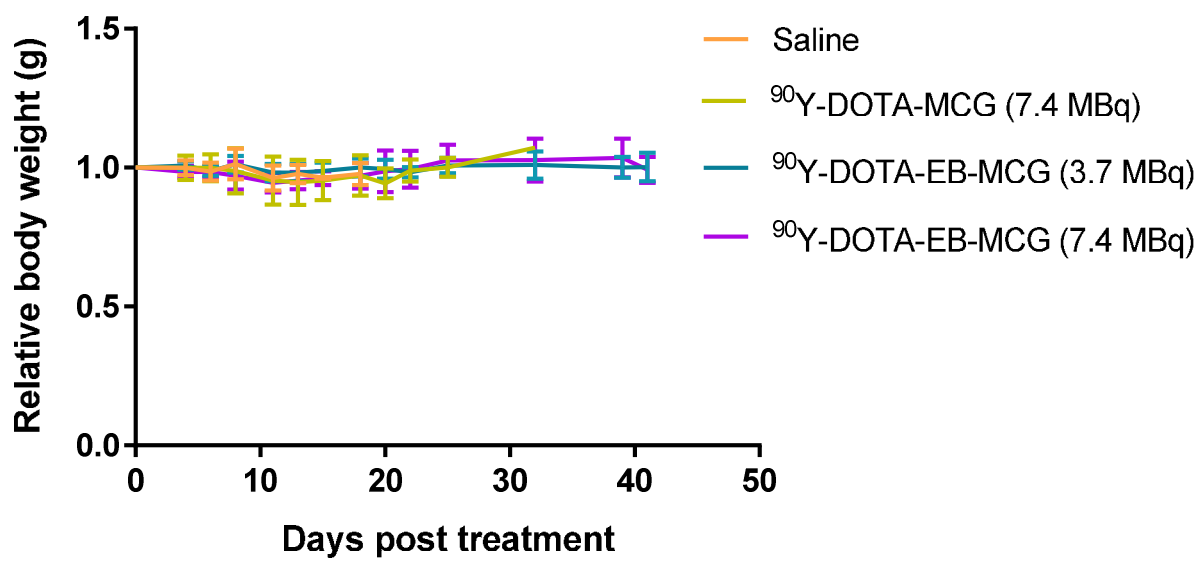

**Figure S3.** Changes of body weight of PC3 PIP tumor bearing mice after radioligand treatment.

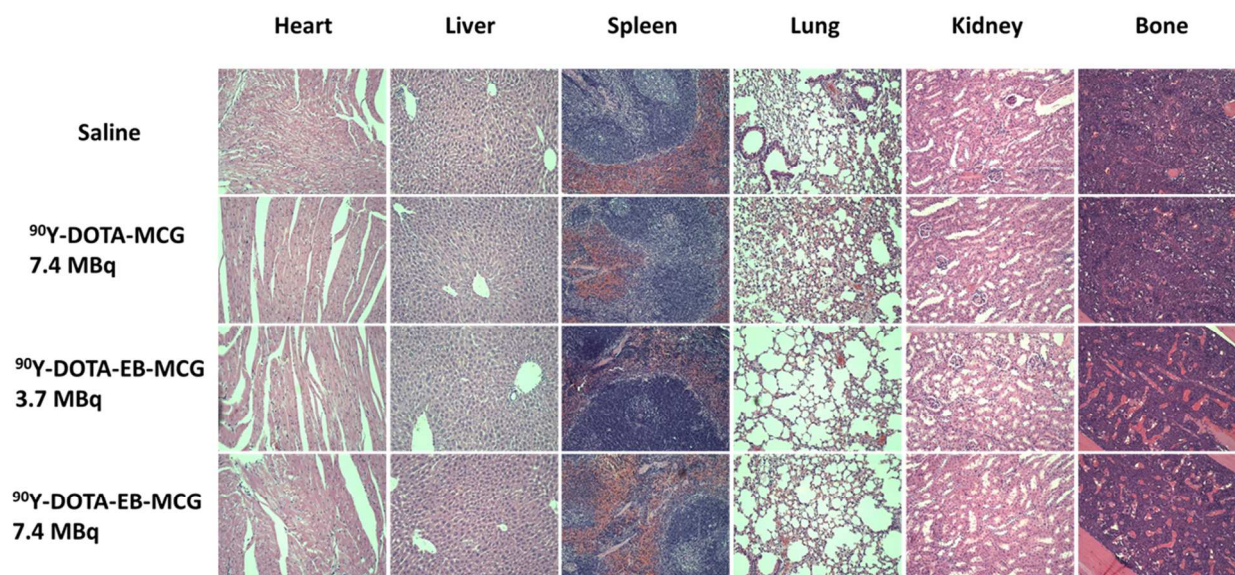

**Figure S4.** H&E staining of tissue sections from mice treated with saline, 7.4 MBq of  $^{90}\text{Y}$ -DOTA-MCG, 3.7 MBq of  $^{90}\text{Y}$ -DOTA-EB-MCG and 7.4 MBq of  $^{90}\text{Y}$ -DOTA-EB-MCG.



## References

- (1) Chen, H.; Jacobson, O.; Niu, G.; Weiss, I. D.; Kiesewetter, D. O.; Liu, Y.; Ma, Y.; Wu, H.; Chen, X. Novel "Add-On" Molecule Based on Evans Blue Confers Superior Pharmacokinetics and Transforms Drugs to Theranostic Agents. *J Nucl Med* **2017**, *58*, 590-597.
- (2) Tian, R.; Jacobson, O.; Niu, G.; Kiesewetter, D. O.; Wang, Z.; Zhu, G.; Ma, Y.; Liu, G.; Chen, X. Evans Blue Attachment Enhances Somatostatin Receptor Subtype-2 Imaging and Radiotherapy. *Theranostics* **2018**, *8*, 735-745.
